# Supplementary material
Source: publisher figshare collection journal article supplement (https://sage.figshare.com/ndownloader/files/20225286)
Supplement: Supplementary file 1 [file 20225286]

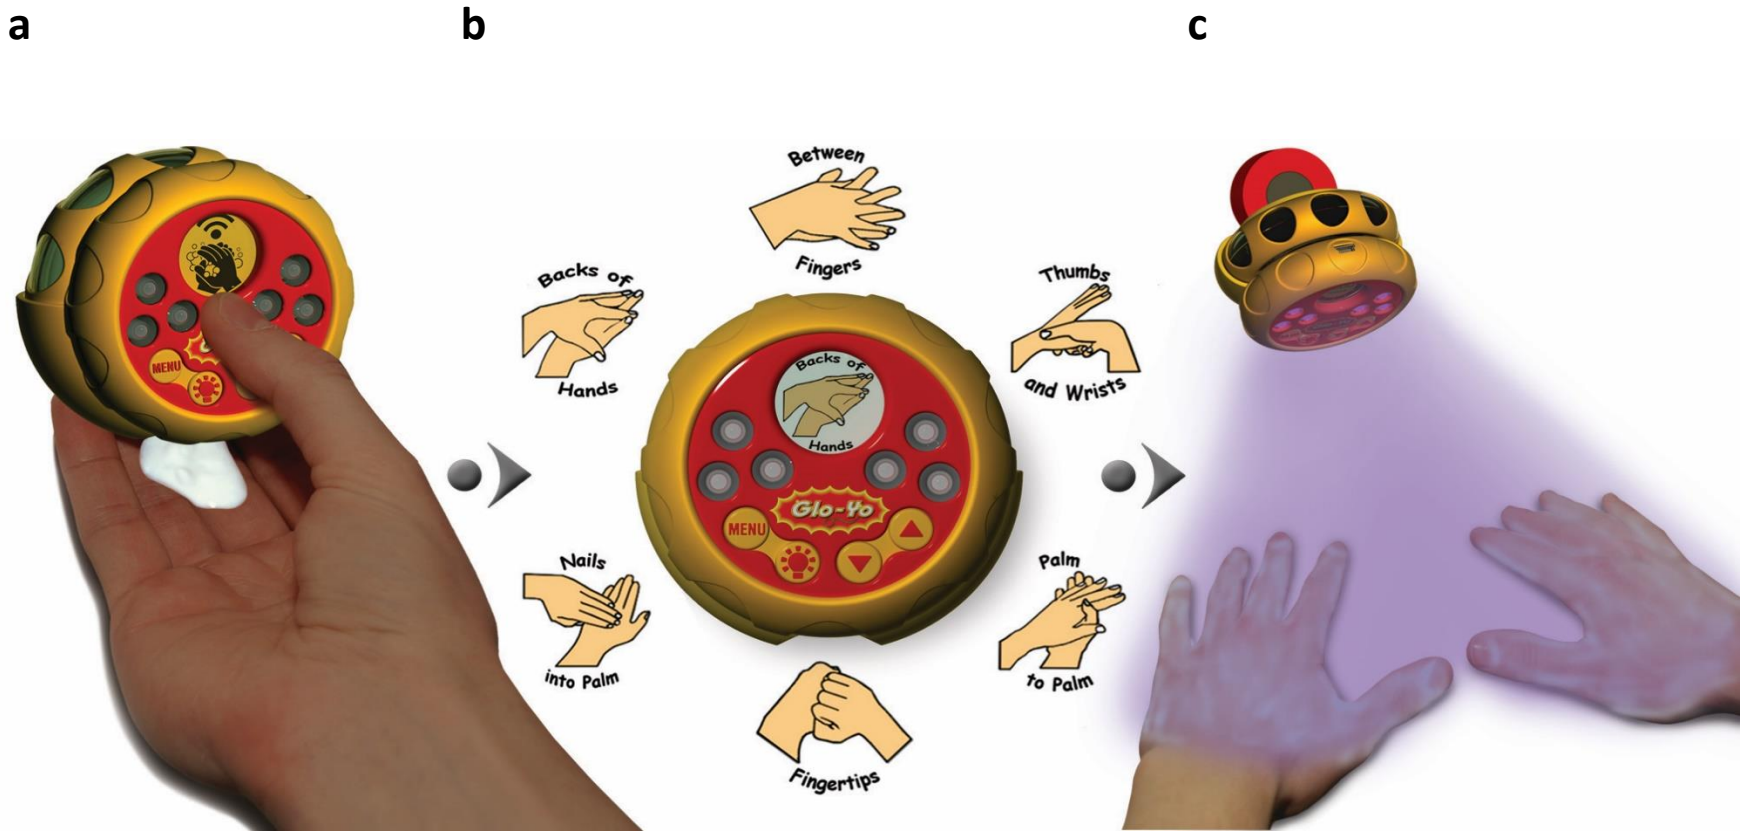

**Supplementary Figure B. Glo-yo interactive educational toy.** (a) handheld Glo-yo, (b) 6 images of the Hand Hygiene Compliance (HHC) steps displayed on the screen during 20 seconds, (c) Ultraviolet (UV) lights illuminate the iridescent cream on hands as a way to assess the effectiveness of HHC (Randle et al. 2013).
